# Supplementary material
Source: Royal Society of Chemistry journal article supplement (doi:10.1039/d5ma01453k)
Supplement: d5ma01453k1.pdf [file d5ma01453k1.pdf]

Supplementary Information

# Ga Back-Graded CuInSe<sub>2</sub> Thin Films for High-Performance Near-Infrared Photodetectors

Temujin Enkhbat<sup>a</sup>, Jieun Park<sup>a</sup>, Sang Hun Lee<sup>b</sup>, Seong Ju Park<sup>a</sup>, Jae Hyung Jang<sup>a\*</sup>

<sup>a</sup>Department of Energy Engineering, KENTECH Institute of Energy Materials and Devices, Korea Institute of Energy Technology, Naju 58330, Republic of Korea

<sup>b</sup>School of Electrical Engineering and Computer Science, Gwangju Institute of Science and Technology, Gwangju 61005, Republic of Korea

## Corresponding Author

\* Jae Hyung Jang  
E-mail: [jjang@kentech.ac.kr](mailto:jjang@kentech.ac.kr)

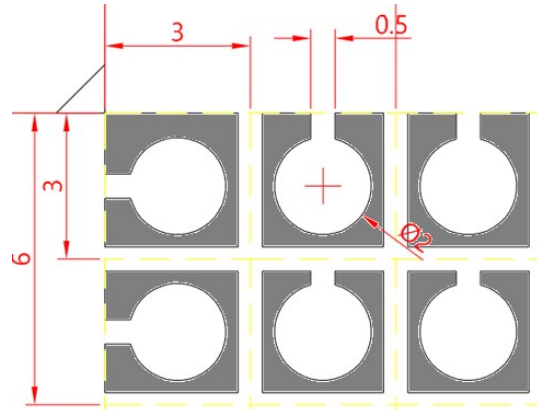

Fig. S1. Schematic layout and dimensional parameters of the Ag top electrode (dimensions in mm).

**Table S1.** State-of-the-art PCE values of CIGSe and CIGS solar cells.

| Device Type | Absorber               | PCE (%) | Optimization Strategy                         | Ref.      |
|-------------|------------------------|---------|-----------------------------------------------|-----------|
| CIGS/SLG    | Ag-alloyed CIGS        | 23.64   | Ag alloying + RbF PDT                         | [1]       |
| CIGS/UTG    | Ag-alloyed CIGS on UTG | 17.81   | Ag alloying + NaF/RbF PDT + ZnMgO             | [2]       |
| CIGSe/SLG   | Ag-alloyed CIGSe       | 18.70   | Ag alloying + Rb-In-Se capping + NaF PDT      | [3]       |
| CIGSe/SLG   | Pure CIGSe             | 13.20   | No front passivation                          | [4]       |
| CIGSe/SLG   | Pure CIGSe             | 6.17    | No front passivation; inverted 1st/3rd stages | This work |

**Table S2.** State-of-the-art NIR photodetection performance of CISE and CIGS photodetectors.

| Material | Device Structure                  | $\lambda$ (nm) | R (AW <sup>-1</sup> ) at 0 V bias | D* (Jones) at 0 V bias | Response Time | Active area          | Ref.      |
|----------|-----------------------------------|----------------|-----------------------------------|------------------------|---------------|----------------------|-----------|
| CIGS     | Mo/CIGS/CdS/ZnO/ITO (SLG)         | 660            | 0.25                              | $1.2 \times 10^{11}$   | 0.05 $\mu$ s  | N/A                  | [5]       |
| CISE     | ITO/HybridHTL/CISE QDs/ZnO/Ag     | 1050           | 0.08                              | $2.1 \times 10^{12}$   | 0.64 ms       | 0.78 mm <sup>2</sup> | [6]       |
| CISE     | ITO/PEDOT:PSS/Mn–CISE QDs/PCBM/Ag | 1000           | 0.03                              | $4.2 \times 10^{12}$   | 0.76 $\mu$ s  | 0.10 cm <sup>2</sup> | [7]       |
| CISE     | SLG/Mo/CISE/CdS/i-ZnO/ITO/Ag      | 1064           | 0.67                              | $2.5 \times 10^{12}$   | 0.18 ms       | 3.14 mm <sup>2</sup> | This work |

**Table S3.** FESEM-EDS analysis of Ref, Ga3 and Ga6 thin films from bottom (P1) to top (P5).

| Elem. | G0 (at.%) |       |       |       |       | G3 (at.%) |       |       |       |       | G6 (at.%) |       |       |       |       |
|-------|-----------|-------|-------|-------|-------|-----------|-------|-------|-------|-------|-----------|-------|-------|-------|-------|
|       | P1        | P2    | P3    | P4    | P5    | P1        | P2    | P3    | P4    | P5    | P1        | P2    | P3    | P4    | P5    |
| Cu    | 23.62     | 23.45 | 23.53 | 23.64 | 23.46 | 22.09     | 22.13 | 22.93 | 23.48 | 23.72 | 22.87     | 22.76 | 23.22 | 24.1  | 24.3  |
| In    | 26.30     | 26.67 | 26.52 | 26.24 | 26.61 | 25.45     | 25.86 | 25.81 | 25.61 | 25.73 | 23.59     | 24.25 | 25.1  | 25.01 | 25.46 |
| Ga    | 0         | 0     | 0     | 0     | 0     | 2.17      | 1.54  | 0.69  | 0.52  | 0.11  | 4.13      | 3.78  | 1.45  | 0.41  | 0.37  |
| Se    | 50.08     | 49.88 | 49.95 | 50.12 | 49.93 | 50.29     | 50.47 | 50.57 | 50.39 | 50.44 | 49.41     | 49.21 | 50.23 | 50.48 | 49.87 |
| CGI   | 0.898     | 0.879 | 0.887 | 0.9   |       |           |       |       |       |       | 0.812     | 0.875 | 0.948 | 0.941 |       |
| GGI   | 0.000     | 0.000 | 0.000 | 0.0   |       |           |       |       |       |       | 0.135     | 0.055 | 0.016 | 0.014 |       |

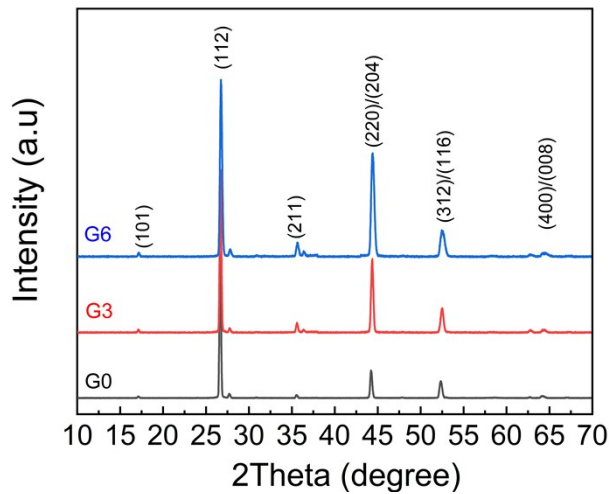

**Fig. S2.** XRD spectrums of CISE films G0, G3 and G6.

**Table S4.** XRD peak positions and FWHM analysis of (112) peak for G0, G3 and G6 thin films.

| XRD peaks | (112) | (220) | (312) | FWHM of (112) |
|-----------|-------|-------|-------|---------------|
| <b>G0</b> | 26.67 | 44.22 | 52.34 | 0.284         |
| <b>G3</b> | 26.70 | 44.35 | 52.48 | 0.232         |
| <b>G6</b> |       |       |       | 0.225         |

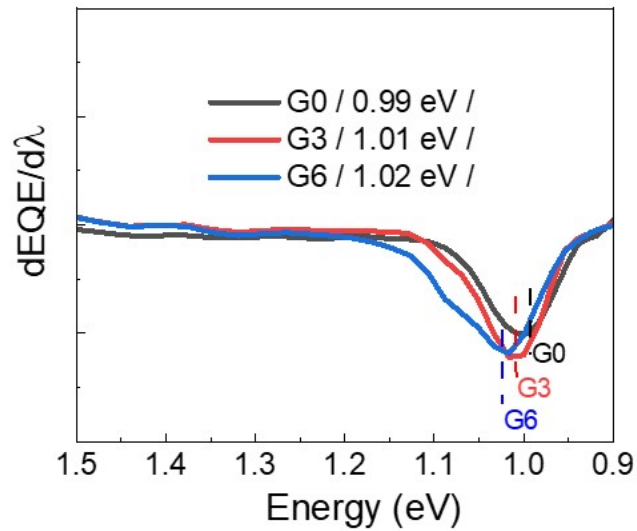

**Fig. S3.** Optical bandgap ( $E_g$ ) extraction of G0, G3 and G6 devices.

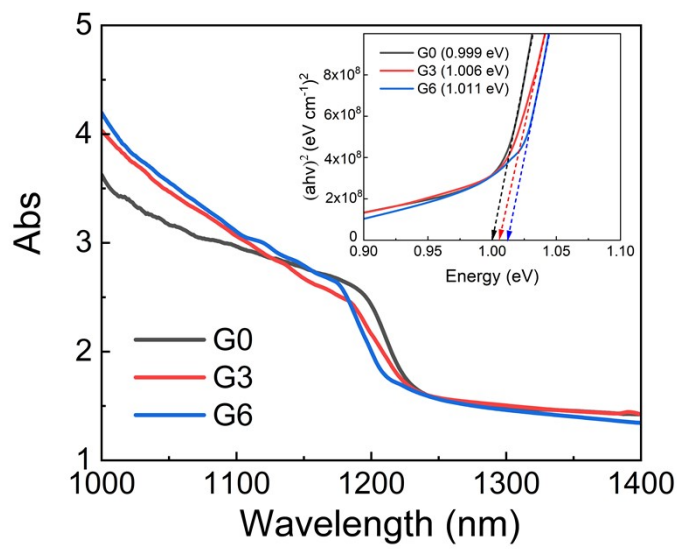

**Fig. S4.** NIR absorption spectra of G0, G3, and G6 thin films deposited on bare SLG substrates. The inset shows the Tauc ( $(\alpha h\nu)^2$  vs.  $h\nu$ ) analysis.

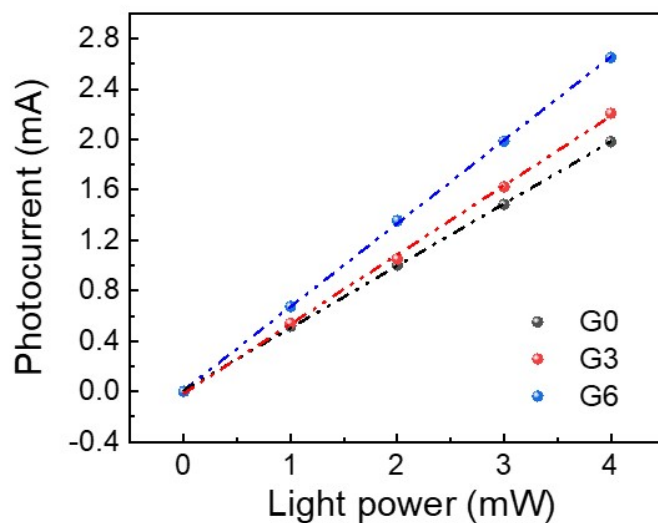

**Fig. S5.** Illumination light power vs. photo-current for G0, G3 and G6 devices at 0 V bias.

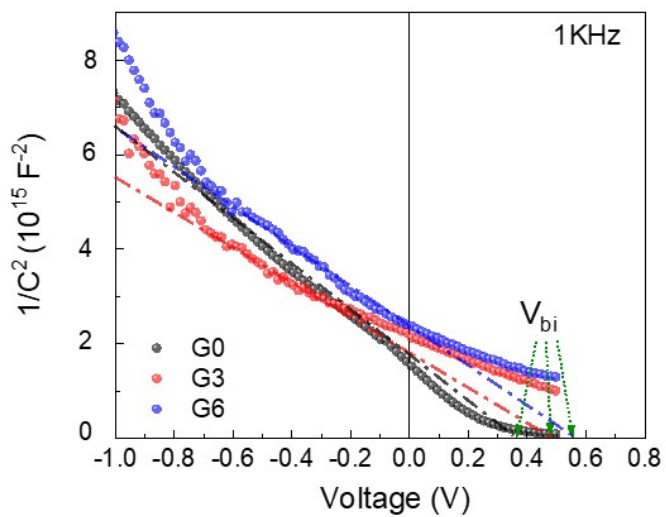

**Fig. S6.** Mott-Schottky plot for G0, G3 and G6 devices.

## References

- [1] J. Keller, K. Kiselman, O. Donzel-Gargand, N. M. Martin, M. Babucci, O. Lundberg, E. Wallin, L. Stolt and M. Edoff, *Nat. Energy*, 2024, 9, 467–478.
- [2] A. M. Amare, I. Hwang, I. Jeong, J. H. Park, J. G. An, S. Song, Y.-J. Eo, A. Cho, J.-S. Cho, S. K. Ahn et al., *J. Alloys Compd.*, 2025, 1024, 180187.
- [3] M. Krause, S.-C. Yang, S. Moser, S. Nishiwaki, A. N. Tiwari and R. Carron, *Sol. RRL*, 2023, 7, 2201122.
- [4] J. Zhang, Z. Ma, Y. Zhang, X. Liu, R. Li, Q. Lin, G. Fang, X. Zheng, W. Li, C. Yang, J. Li, J. Gong and X. Xiao, *Nat. Commun.*, 2024, 15, 10365.
- [5] M. Yuan, B. Jiang, L. Zeng, C. Zeng, R. Lin, W. Xin, G. Yan and R. Hong, *Appl. Surf. Sci.*, 2023, 637, 157867.
- [6] S. Li, J. H. Jang, W. Chung, H. Seung, S. I. Park, H. Ma, W. J. Pyo, C. Choi, D. S. Chung, D.-H. Kim, M. K. Choi and J. Yang, *ACS Nano*, 2023, 17, 20013–20023.
- [7] R. Guo, J. Meng, W. Lin, A. Liu, T. Pullerits, K. Zheng and J. Tian, *Chem. Eng. J.*, 2021, 403, 126452.
